# Supplementary material for: An enzyme-responsive and NIR-triggered lipid–polymer hybrid nanoplatform for synergistic photothermal/chemo cancer therapy
Source: Royal Society of Chemistry journal article supplement (doi:10.1039/d2bm00216g), 2022-01-01
Supplement: d2bm00216g1.pdf [file d2bm00216g1.pdf]

## Supporting information

### An enzyme-responsive and NIR-triggered lipid-polymer hybrid nanoplatform for synergistic photothermal/chemo cancer therapy

Lu Tang,<sup>†a,b</sup> Qiaqia Xiao,<sup>†a,b</sup> Yue Yin,<sup>a,b</sup> Yijun Mei,<sup>a,b</sup> Jing Li,<sup>a,b</sup> Lin Xu,<sup>a,b</sup> Hongbin Gao,<sup>\*C</sup> and Wei Wang,<sup>\*a,b</sup>

<sup>a</sup> State Key Laboratory of Natural Medicines, Department of Pharmaceutics, School of Pharmacy, China Pharmaceutical University, Nanjing 210009, Jiangsu, P.R. China.

<sup>b</sup> NMPA Key Laboratory for Research and Evaluation of Pharmaceutical Preparations and Excipients, China Pharmaceutical University, Nanjing 210009, Jiangsu, P.R. China.

<sup>c</sup> Department of Pharmacy, Baoshan Branch, Renji Hospital, School of Medicine, Shanghai Jiao Tong University, Shanghai 200444, P.R. China.

† These authors contributed equally to this work.

Corresponding authors: Wei Wang, email: wangcpu209@cpu.edu.cn; Hongbin Gao, email: gaohongb\_1981@163.com

**Table S1** The impact of molar ratio of PEI to DCA and the molecular weight of PEI on grafting ratio of DCA. (The selected molar ratio is in bold)

| Molecular weight of PEI | Molar ratio of DCA to PEI | Grafting ratio of DCA |
|-------------------------|---------------------------|-----------------------|
| 1.8 KDa                 | 6:1                       | 11.20%                |
|                         | 10:1                      | 15.10%                |
|                         | 12:1                      | 15.37%                |
| <b>10 KDa</b>           | 6:1                       | 7.81%                 |
|                         | <b>10:1</b>               | <b>11.00%</b>         |
|                         | 12:1                      | 13.64%                |

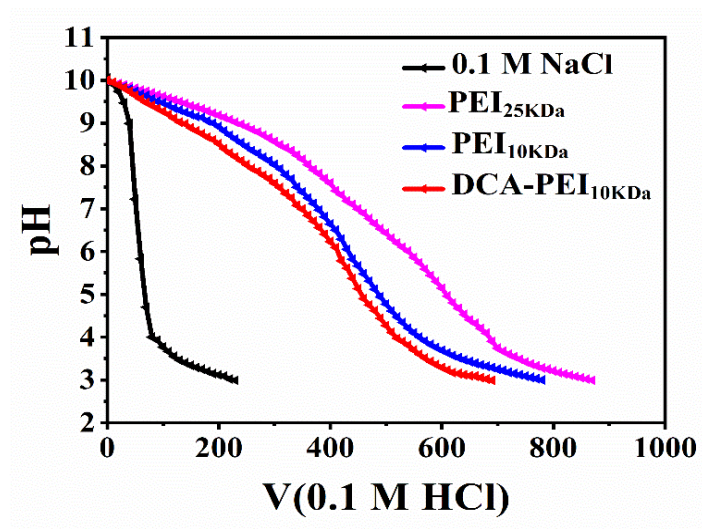

**Fig. S1** The proton buffering capacity of 0.1 M NaCl, PEI<sub>25k</sub>, PEI<sub>10k</sub> and DCA-PEI<sub>10k</sub> conjugates.

**Table S2** The impact of molar ratio of DCA-PEI to ICG on stability of nanosystem. (The selected molar ratio is in bold)

| Molar ratio of DCA-PEI to ICG | Structure of nanosystem | Phenomenon                                                                            |
|-------------------------------|-------------------------|---------------------------------------------------------------------------------------|
| 4.5                           | Loose, unstable         |  |
| <b>9</b>                      | <b>Dense, stable</b>    |  |
| 13.5                          | Dense, stable           |  |

0.4 0.6 0.8 1 2 3 5 10

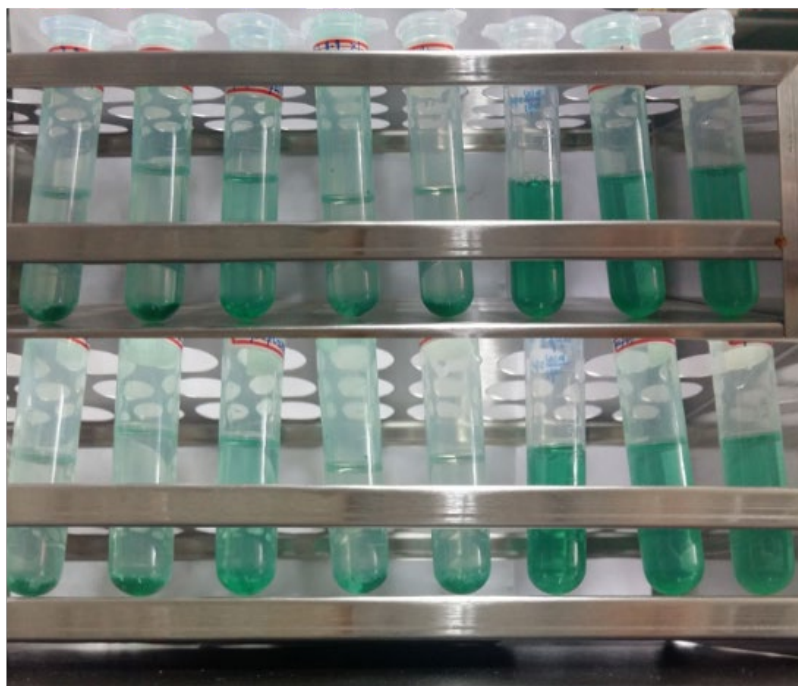

**Fig. S2** Different experimental phenomenon of different mass ratios of DSPE-PEG<sub>2000</sub> to PEI (up) and DCA-PEI (down), the selected malar ratio is in bold.

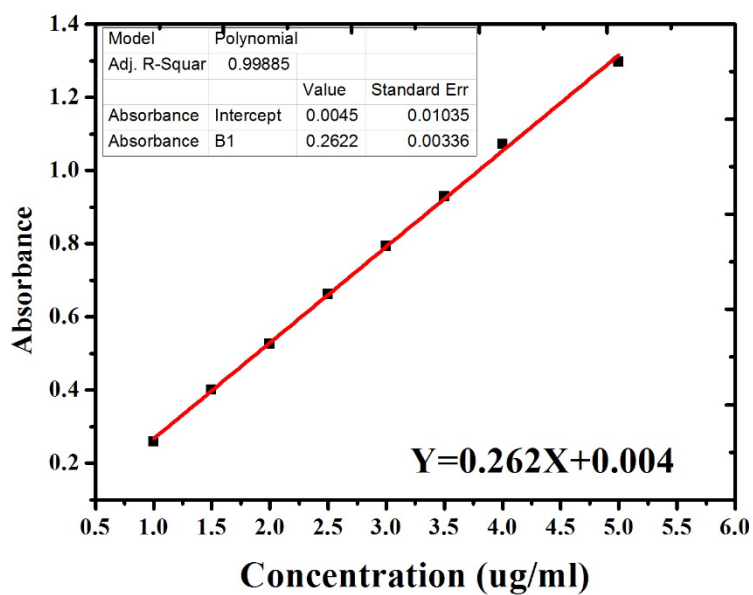

**Fig. S3** Linear regression of UV-Vis absorbance to the concentration of Free ICG.

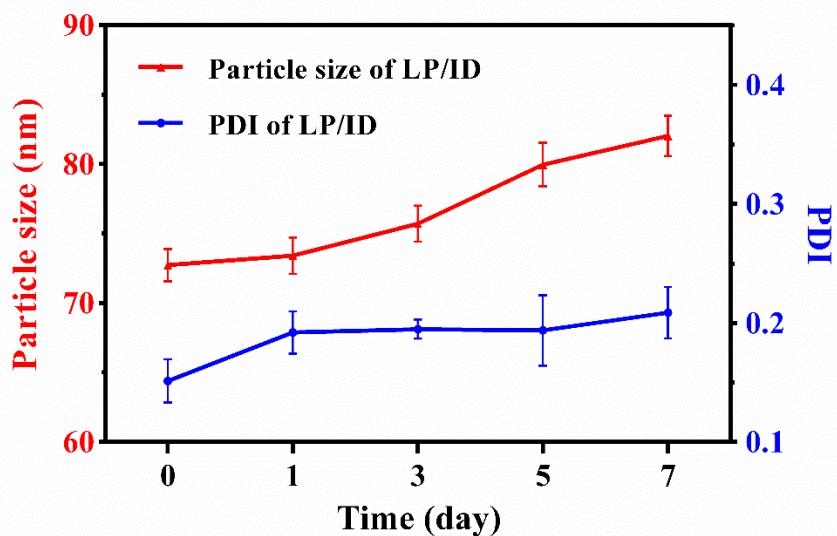

Fig. S4 Particle size and PDI changes of LP/ID within 7 days.

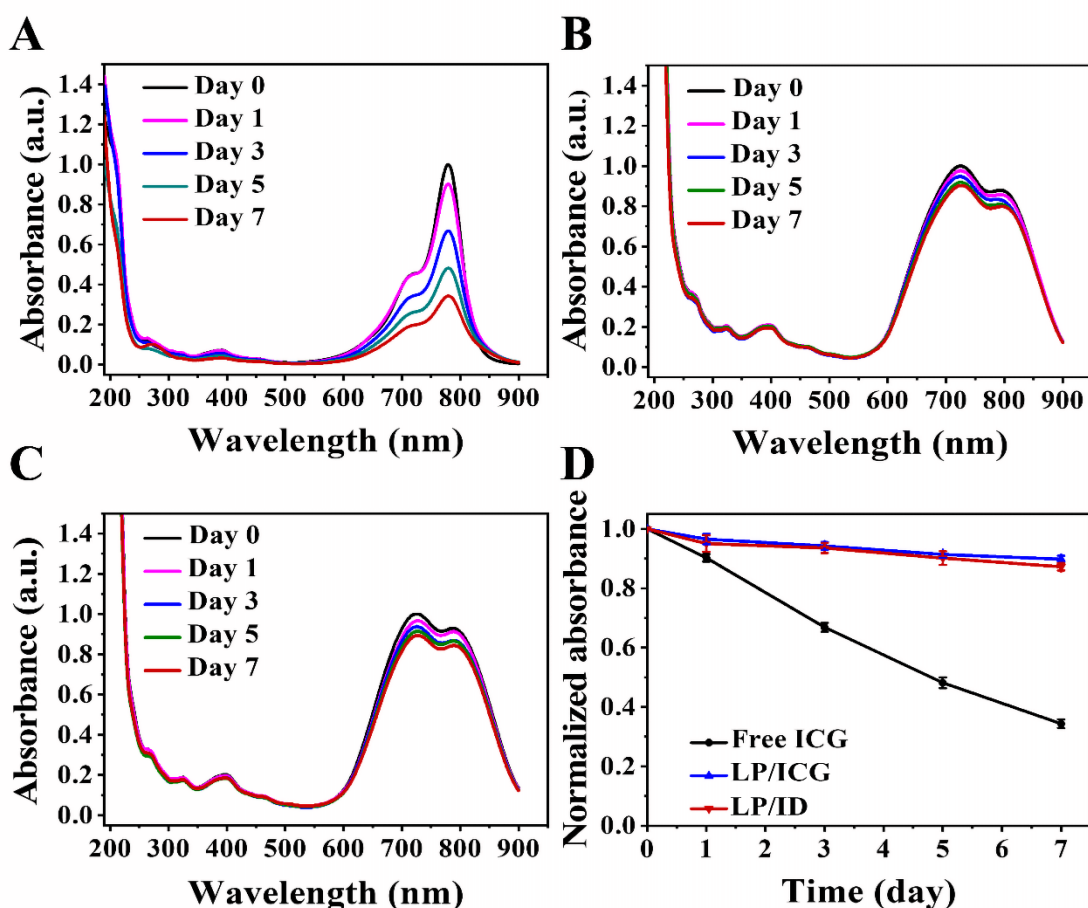

Fig. S5 UV-Vis absorption changes of (A) Free ICG, (B) LP/ICG and (C) LP/ID within 7 days.

(D) The comparison of absorbance changes of three formulations within one week.

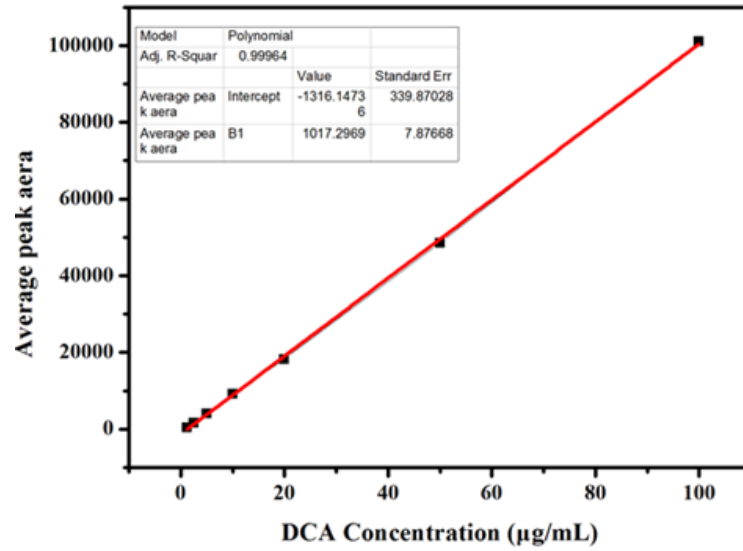

**Fig. S6** The linear regression of average peak area to the concentration of free DCA by HPLC analysis. ( $Y = 1010.2X - 985.21$ ,  $R^2 = 0.99964$ )

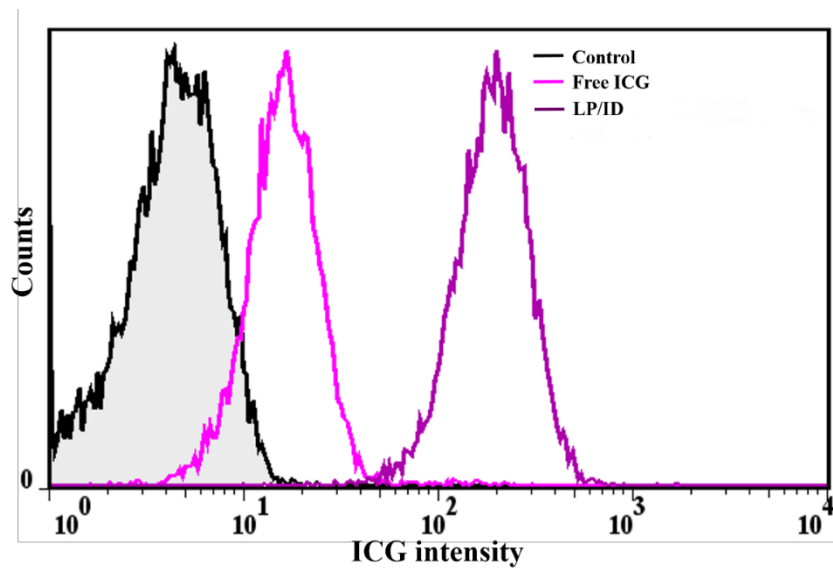

**Fig. S7** Cellular uptake analyzed by flow cytometric of control, free ICG, and LP/ID (15 µg/mL ICG for 4 h incubation).
